# Supplementary material
Source: MDPI journal article supplement (https://www.mdpi.com/1999-4907/10/4/343)
Supplement: s1 [file s1]

Archive with 5 entries (5 files):
- Figure S1. Quantitative assay results for GFP and FmTCP15 gene in transient overexpression of FmTCP15 seedlings.pdf
- Table S1 Primers for quantitative RT-PCR (qRT-PCR) .xlsx
- Table S2 Primers for  yeast two-hybrid assay  (Y2H) .xlsx
- Table S3 Amino acid sequences for multiple sequence alignment.xlsx
- Table S4, Amino acid sequences for phylogenetic tree construction.xlsx
