# Supplementary material
Source: MDPI journal article supplement (https://www.mdpi.com/1999-4907/10/4/343)
Supplement: s1 [file s1 › Figure S1. Quantitative assay results for GFP and FmTCP15 gene in transient overexpression of FmTCP15 seedlings.pdf]

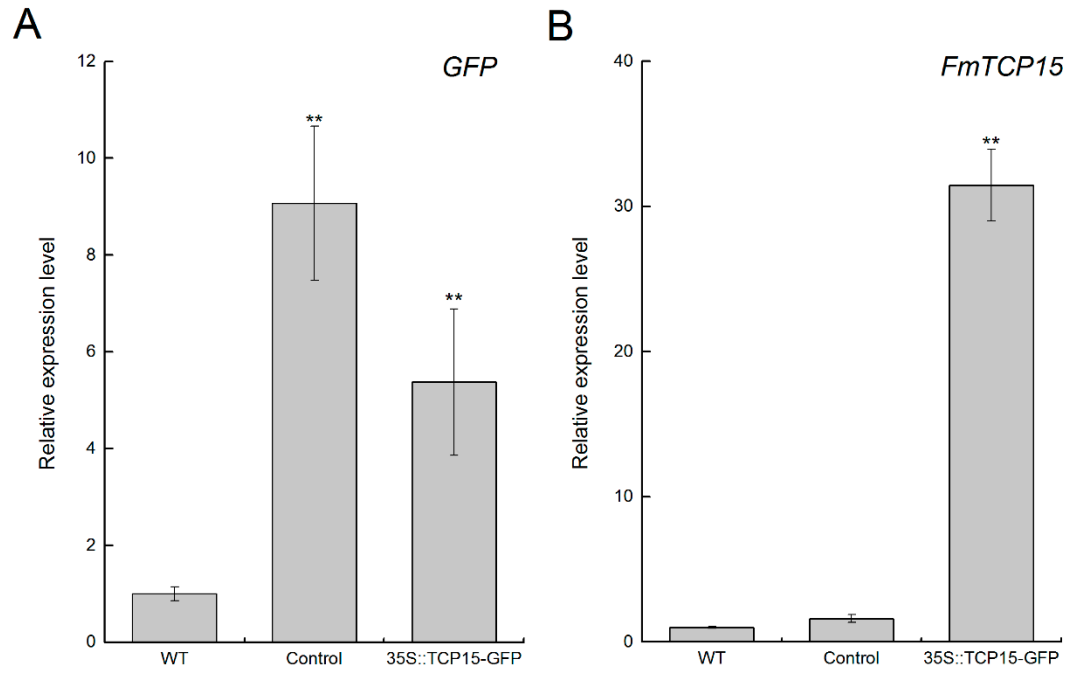

**Figure S1.** Quantitative assay results for GFP and FmTCP15 gene in transient overexpression of FmTCP15 seedlings. The expression profile data of GFP and FmTCP15 gene were obtained through quantitative RT-PCR. \* Indicates a significant difference between wild type, control and 35S::FmTCP15-GFP ( $P < 0.05$ ). \*\* Indicates a highly significant difference between wild type, control and 35S::FmTCP15-GFP ( $P < 0.01$ ) according to Duncan's multiple range test.
