# Supplementary material
Source: MDPI journal article supplement (https://www.mdpi.com/1999-4907/10/4/343)
Supplement: s1 [file s1 › Table S1 Primers for quantitative RT-PCR (qRT-PCR) .xlsx]

## Sheet: Sheet1
Table S1. Primers for quantitative RT-PCR (qRT-PCR)
Purpose	Name	Sequences (5'-3')
qRT-PCR	qRT-FmTCP15-F	GTTCCACCAGTTCCGCTTACTCTTC
	qRT-FmTCP15-R	GGAGGAGGCAGCAGTTGATCGA
	qRT-TCP2-F	TCCAATTCTTCCTCGCCGTCTCT
	qRT-TCP2-R	GAATGCCTGCCACCATCACCATAG
	qRT-TCP4-F	CTTCGGCTGAGTCCAGTTCC
	qRT-TCP4-R	TGCTGTGGCTGTTGTTGGTTAT
	qRT-TCP14-F	CGGAGCCAGCGGTGTTTG
	qRT-TCP14-R	AAACCCTCCTCTGTGAATCTTCAATAC
	qRT-RGA1-F	GATGTTTGATGTAAGGGAGGGTG
	qRT-RGA1-R	TTCATCTCGCTCACGACTTGC
	qRT-SPY-F	CGTGCCATCTTTGAGGCGTAT
	qRT-SPY-R	TTTCCAGCAGGTGCGTTGC
	qRT-LOX2-F	ACCACCACCACCACCAGCGTTA
	qRT-LOX2-R	TGGCTTCTCCGATCCAGTCTGAGG
	qRT-AOS-F	CTTCGCCACTTGCTTCAACTCCT
	qRT-AOS-R	CGGATCTCTTGTGCCAACTCTGTATG
	qRT-ABI4-F	CGTGAGCCAAGAAAGCGAACT
	qRT-ABI4-R	GAAGAACGGGAAGAGGATTGATTAG
	qRT-ABI5-F	TTGACGCTTCCACGGACTCTGA
	qRT-ABI5-R	CATCTTCCCTTACTACGCCTGCTTTC
	qRT-IAA3-F	CAGGAATAGTAGCGGGAAGAGAGGAT
	qRT-IAA3-R	AGGTGGTTTAGCAGAATCAGTGGAAG
	qRT-AP2-F	CCATGCTCGTCGGAGTGTGAAC
	qRT-AP2-R	GTGTGGTCGGTCGCTTGATGTAG
	qRT-RAP2.1-F	CAGAGGAATCCGCATGAGGAAGTG
	qRT-RAP2.1-R	CGGCGACAGGCGAAGAATAAGAG
	qRT-RAP2.12-F	TGAATCCTTGTGAACGGCTTCCTAAG
	qRT-RAP2.12-R	ATAGTTGGCATTGTCCAGCGTGTT
	qRT-PIN2-F	TTGGTCAGTCCGATACAGGTAGAGTT
	qRT-PIN2-R	CTGGCAATGATGGGCTGGTGAG
	qRT-NAC1-F	AGGTGGAGGTGGAGGTGGTTGT
	qRT-NAC1-R	GCTGCTACGGAAATGTCCCAAGGT
	qRT-DAR1-F	GGTTACTGACTGGGTCTATCCTGG
	qRT-DAR1-R	GATCGTACTTGAGCACTGCCTTG
	qRT-DAR2-F	CGGTGACTGCCAACCACTTTATC
	qRT-DAR2-R	CTCATACCTACTAGACCACGACCCC
	qRT-LOB-F	AGTCTACGGCTGCGTTGGTG
	qRT-LOB-R	ACTTTCATTGCCCATCCTTGC
	qRT-CBF-F	GGAGGAAATCTGGTAAGTGGGTG
	qRT-CBF-R	AAAGGTCTTGGCTGCTTCTGC
	qRT-ICE1-F	CAGTTGGAGCACAACCCACTCTC
	qRT-ICE1-R	ACCAGTCTCATCCACCTTATTGACA
	qRT-ICS1-F	CATTTCTAGCGATGCTTTGGC
	qRT-ICS1-R	CTCATGGTGGTCTTTAGGACTGG
	qRT-PCNA2-F	GCATTACCGATGTGACAGGAACCTT
	qRT-PCNA2-R	CTGCCGTCGTCAGCCTTAATAGTG
	qRT-CCA1-F	CAAATGGGTGGATTTAATGGACAC
	qRT-CCA1-R	TCTTGATTGTGGATTGGGTTCG
	GFP-F	ATGTGGTCTCTCTTTTCGTTGG
	GFP-R	TGGCAGACAAACAAAAGAATGG
	Fm-TU-F	AGGACGCTGCCAACAACTTT
	Fm-TU-R	TTGAGGGGAAGGGTAAATAGTG
