# Supplementary material
Source: MDPI journal article supplement (https://www.mdpi.com/1999-4907/10/4/343)
Supplement: s1 [file s1 › Table S2 Primers for yeast two-hybrid assay (Y2H) .xlsx]

## Sheet: Sheet1
Table S2. Primers for yeast two-hybrid assay (Y2H)
Purpose	Name	Sequences (5'-3')
yeast two-hybrid assay	TCP15-BD-F	GAATTCCCGGGGATCATGGAAGGATTAGGTGATGA
	TCP15-BD-R	GCAGGTCGACGGATCTCATGAATGGTGGTTCGTAG
	TCP2-AD-F	CATCGATACGGGATCATGGAGGCGGATGACATTC
	TCP2-AD-R	CGAGCTCGATGGATCTCAGTTCTTTCTTTTTCCCTT
	TCP14-AD-F	CATCGATACGGGATCATGATCATGGATAGTGGAAG
	TCP14-AD-R	CGAGCTCGATGGATCTCATAAGTGGTTACTAGTTGT
	TCP15-AD-F	CATCGATACGGGATCATGGAAGGATTAGGTGATGA
	TCP15-AD-R	CGAGCTCGATGGATCTCATGAATGGTGGTTCGTAG
	TCP4-AD-F	CATCGATACGGGATCATGTCGTCAAGATTGAGAAAC
	TCP4-AD-R	CGAGCTCGATGGATCTCAATGGCGGGAATCAGAG
	ABI5-AD-F	CATCGATACGGGATCATGGGGAGTAATTTTAACTTC
	ABI5-AD-R	CGAGCTCGATGGATCTCACATTACATTCTGCTTTCG
	CUC1-AD-F	CATCGATACGGGATCATGGAAAAAGTATCTGGTTTTA
	CUC1-AD-R	CGAGCTCGATGGATCTTAACAATTCCAGAGAAAATCA
	LOX2-AD-F	CATCGATACGGGATCATGTTGAACCTTAGTATCCC
	LOX2-AD-R	CGAGCTCGATGGATCTCAAATGGAAATGCTATTAGG
	GAI-AD-F	CATCGATACGGGATCATGAAAAGAGAACGTGATCTT
	GAI-AD-R	CGAGCTCGATGGATCCTACTCTTGGGGTTTCAGC
	RGA1-AD-F	CATCGATACGGGATCATGAAAAGGGACAATTCGAAT
	RGA1-AD-R	CGAGCTCGATGGATCTTAGCTGAGTTTCCAAGCC
	AOS1-AD-F	CATCGATACGGGATCATGGCTTCATCTTCTTTAGC
	AOS1-AD-R	CGAGCTCGATGGATCCTAGAAACTGGCTTTCTTTAA
	CCA1-AD-F	CATCGATACGGGATCATGGACCCTTATTCGTCTG
	CCA1-AD-R	CGAGCTCGATGGATCTTAGGTAGAAGCTTCTCCTT
	ICS1-AD-F	CATCGATACGGGATCATGGGCAGCCTCAATTCC
	ICS1-AD-R	CGAGCTCGATGGATCTTAGCGATCCGCCACTTTT
	CBF-AD-F	CATCGATACGGGATCATGGATATTTTAACAAATCTCTA
	CBF-AD-R	CGAGCTCGATGGATCTTAAATCGAGTAACTCCATAAA
	ICE1-AD-F	CATCGATACGGGATCATGTTGTCGAGAACTAACAG
	ICE1-AD-R	CGAGCTCGATGGATCTTACACCATCCCATGAAAGC
	IAA3-AD-F	CATCGATACGGGATCATGAGGAGCACAATCGGTG
	IAA3-AD-R	CGAGCTCGATGGATCTCAGCATCTGTTCTTGCAC
	AUX1-AD-F	CATCGATACGGGATCATGTTGCATCAGAAGCAAGC
	AUX1-AD-R	CGAGCTCGATGGATCTCAATGGTGTGAAGTCGTTG
	CYC2-AD-F	CATCGATACGGGATCATGAACCGTCGTCCTACG
	CYC2-AD-R	CGAGCTCGATGGATCTCAAAAGAGAGAGAGATGTAC
	LOB-AD-F	CATCGATACGGGATCATGGCTTCATCCAGTTCATA
	LOB-AD-R	CGAGCTCGATGGATCTTAAATATTTCCATCTGCCCC
	SPY-AD-F	CATCGATACGGGATCATGGCTTGGACAGAAAATGA
	SPY-AD-R	CGAGCTCGATGGATCTCATTCAACTGCTTCCTTTC
	DA1-AD-F	CATCGATACGGGATCATGGGTTGGCTAACCAAGA
	DA1-AD-R	CGAGCTCGATGGATCTCAGCACGGAAAGCTTCC
	DAR1-AD-F	CATCGATACGGGATCATGGGTTGGCTAACCAAGA
	DAR1-AD-R	CGAGCTCGATGGATCTTAACATGGGAAGCTTCCC
	NAC-AD-F	CATCGATACGGGATCATGAGCAGTCTGAGCATGG
	NAC-AD-R	CGAGCTCGATGGATCTCAATGGTAATTCCACATTGA
	AP2-AD-F	CATCGATACGGGATCATGTGGAATCTCAATGATTCT
	AP2-AD-R	CGAGCTCGATGGATCTCAGCTATGAGGGGCTTG
	PCNA2-AD-F	CATCGATACGGGATCATGTTGGAACTGAGGTTAGT
	PCNA2-AD-R	CGAGCTCGATGGATCTCAAGGCTTAGGGTCTTCA
	PIN-AD-F	CATCGATACGGGATCATGATAAGTTGGCACGATCT
	PIN-AD-R	CGAGCTCGATGGATCTTATAATCCAAGAACAATGTAAT
	ABI4-AD-F	CATCGATACGGGATCATGAGCAGCAGCGGTGTA
	ABI4-AD-R	CGAGCTCGATGGATCTTAAATATCAAAAAAGAATGGATC
	DAR2-AD-F	CATCGATACGGGATCATGTCTTCTTCAAACGTCAAC
	DAR2-AD-R	CGAGCTCGATGGATCTTAATACGTATTACCGTTAAGA
	ICE2-AD-F	CATCGATACGGGATCATGGGTTATAATGGGATTAGT
	ICE2-AD-R	CGAGCTCGATGGATCCTATATCACAGCATGAAACC
