# Supplementary material
Source: MDPI journal article supplement (https://www.mdpi.com/1999-4907/10/4/343)
Supplement: s1 [file s1 › Table S3 Amino acid sequences for multiple sequence alignment.xlsx]

## Sheet: Sheet1
Table S3. Amino acid sequences for multiple sequence alignment
Purpose	Species	Accession number
Multiple sequence alignment	Fraxinus mandshurica	AQZ26684.1
	Arabidopsis thaliana	NP_564973.1
	Daucus carota subsp. sativus	XP_017254725.1
	Glycine max	XP_003520071.1
	Gossypium hirsutum	XP_016705573.1
	Helianthus annuus	XP_021978439.1
	Jatropha curcas	XP_012067620.1
	Nelumbo nucifera	XP_010257089.1
	Nicotiana tabacum	XP_016479090.1
	Populus trichocarpa	XP_006384036.1
	Prunus persica	XP_007209184.1
	Sesamum indicum	XP_011071008.1
	Theobroma cacao	XP_017969954.1
	Vitis vinifera	XP_002268569.1
