# Supplementary material
Source: MDPI journal article supplement (https://www.mdpi.com/1999-4907/10/4/343)
Supplement: s1 [file s1 › Table S4, Amino acid sequences for phylogenetic tree construction.xlsx]

## Sheet: Sheet1
Table S4. Amino acid sequences for phylogenetic tree construction
Purpose	Family	Species	Name	Accession number
phylogenetic relationships	Oleaceae	Fraxinus mandshurica	FmTCP15	AQZ26684.1
	Bombacaceae	Durio zibethinus	DzTCP15-like	XP_022735317.1
	Compositae	Helianthus annuus	HaTCP15-like	XP_021978439.1
	Convolvulaceae	Ipomoea nil	InTCP14	XP_019198053.1
	Cucurbitaceae	Cucumis melo	CmTCP14	XP_008453196.1
	Cucurbitaceae	Cucumis sativus	CsTCP14	XP_004138164.2
	Euphorbiaceae	Ricinus communis	RcTCP14	XP_002511563.1
	Euphorbiaceae	Hevea brasiliensis	HbTCP14-like	XP_021651737.1
	Euphorbiaceae	Jatropha curcas	JcTCP14	XP_012080249.1
	Euphorbiaceae	Manihot esculenta	MeTCP14	XP_021634244.1
	Fabaceae	Lupinus angustifolius	LaTCP14-like	XP_019438226.1
	Fabaceae	Medicago truncatula	MtTCP15	XP_003609053.1
	Funariaceae	Physcomitrella patens	PpTCP	XP_024387677.1
	Juglandaceae	Juglans regia	JrTCP14	XP_018826533.1
	Leguminosae	Glycine max	GmTCP14	XP_003525467.1
	Leguminosae	Vigna angularis	VaTCP14	XP_017412389.1
	Leguminosae	Vigna radiata var. radiata	VrTCP14	XP_014495703.1
	Malvaceae	Gossypium arboreum	GaTCP14-like	XP_017644018.1
	Malvaceae	Gossypium hirsutum	GhTCP14-like	XP_016712982.1
	Musaceae	Musa acuminata subsp. malaccensis	MaTCP15-like	XP_009410394.1
	Myrtaceae	Eucalyptus grandis	EgTCP14	XP_010029552.1
	Nymphaeaceae	Nelumbo nucifera	NnTCP15-like	XP_010257089.1
	Oleaceae	Olea europaea var. sylvestris	OeTCP14-like	XP_022844971.1
	Orchidaceae	Dendrobium catenatum	DcTCP15-like	XP_020697754.1
	Palmae	Phoenix dactylifera	PdTCP15-like	XP_008807718.1
	Plantaginaceae	Antirrhinum majus subsp. majus	AmTCP	CAE45599.1
	Poaceae	Brachypodium distachyon	BdTCP15	XP_014755137.1
	Poaceae	Dichanthelium oligosanthes	DoTCP15	OEL37764.1
	Poaceae	Oryza sativa Japonica Group	OsTCP15	XP_015641757.1
	Poaceae	Setaria italica	SiTCP15	XP_004965036.1
	Rhamnaceae	Ziziphus jujuba	ZjTCP14	XP_015883510.1
	Rosaceae	Malus domestica	MdTCP14-like	XP_008374541.1
	Rosaceae	Prunus avium	PaTCP15-like	XP_021820713.1
	Salicaceae	Populus euphratica	PeTCP14-like	XP_011027800.1
	Salicaceae	Populus trichocarpa	PtTCP14	XP_006384036.1
	Solanaceae	Capsicum annuum	CaTCP14	XP_016562806.1
	Solanaceae	Nicotiana tabacum	NtTCP14-like	XP_016464955.1
	Solanaceae	Solanum lycopersicum	SlTCP17	NP_001233815.1
	Solanaceae	Solanum pennellii	SpTCP14-like	XP_015077184.1
	Solanaceae	Solanum tuberosum	StTCP14-like	XP_006354786.1
	Sterculiaceae	Theobroma cacao	TcTCP15	XP_017969954.1
	Vitaceae	Vitis vinifera	VvTCP15	RVW90470.1
